# Supplementary material for: The Encapsulation of Citicoline within Solid Lipid Nanoparticles Enhances Its Capability to Counteract the 6-Hydroxydopamine-Induced Cytotoxicity in Human Neuroblastoma SH-SY5Y Cells
Source: MDPI journal article supplement (doi:10.3390/pharmaceutics14091827), 2022-08-30

# SUPPLEMENTARY MATERIALS

FOR

## **Encapsulation of Citicoline within Solid Lipid Nanoparticles enhances its capability to counteract the 6-hydroxydopamine-induced cytotoxicity in human neuroblastoma SH-SY5Y cells**

BY

Andrea Margari<sup>1,2</sup>, Anna Grazia Monteduro<sup>1,2</sup>, Silvia Rizzato<sup>1,2</sup>, Loredana Capobianco<sup>3</sup>, Alessio Crestini<sup>4</sup>, Roberto Rivabene<sup>4</sup>, Paola Piscopo<sup>4</sup>, Mara D'Onofrio<sup>5</sup>, Valeria Manzini<sup>5</sup>, Giuseppe Trapani<sup>6</sup>, Alessandra Quarta<sup>2</sup>, Giuseppe Maruccio<sup>1,2</sup>, Carmelo Ventra<sup>7</sup>, Luigi Lieto<sup>7</sup>, and Adriana Trapani<sup>6</sup>

<sup>1</sup> Omnics Research Group, Department of Mathematics and Physics "Ennio De Giorgi", University of Salento and INFN Sezione di Lecce, Via per Monteroni, 73100, Lecce, Italy

<sup>2</sup> CNR-NANOTEC Institute of Nanotechnology, Via Monteroni, 73100 Lecce, Italy

<sup>3</sup> Department of Biological and Environmental Sciences and Technologies, University of Salento, 73100 Lecce, Italy

<sup>4</sup> Department of Neuroscience-Istituto Superiore di Sanità-viale Regina Elena 299-00161-Rome, Italy

<sup>5</sup> European Brain Research Institute (EBRI) "Rita Levi-Montalcini", Rome, Italy; viale Regina Elena 295-00161-Rome, Italy

<sup>6</sup> Department of Pharmacy-Drug Sciences, University of Bari "Aldo Moro", via Orabona, 4-70125 Bari, Italy; [adriana.trapani@uniba.it](mailto:adriana.trapani@uniba.it) (A.T.)

<sup>7</sup> Esseti Farmaceutici, Via Cavalli di Bronzo, 39-46, 80046 San Giorgio a Cremano, Naples, Italy

## Excel S1: RESULTS ANALYSIS OF THE TEM SIZE OF MORE THAN 100 PARTICLES BY IMAGE J SOFTWARE

|    | Label       | Length  |
|----|-------------|---------|
| 1  | Particle 1  | 869.300 |
| 2  | Particle 2  | 980.235 |
| 3  | Particle 3  | 757.701 |
| 4  | Particle 4  | 775.779 |
| 5  | Particle 5  | 813.907 |
| 6  | Particle 6  | 448.884 |
| 7  | Particle 7  | 155.482 |
| 8  | Particle 8  | 280.505 |
| 9  | Particle 9  | 272.350 |
| 10 | Particle 10 | 355.064 |
| 11 | Particle 11 | 541.527 |
| 12 | Particle 12 | 244.346 |
| 13 | Particle 13 | 231.271 |
| 14 | Particle 14 | 231.621 |
| 15 | Particle 15 | 389.596 |
| 16 | Particle 16 | 304.379 |
| 17 | Particle 17 | 855.767 |
| 18 | Particle 18 | 497.907 |
| 19 | Particle 19 | 295.291 |
| 20 | Particle 20 | 257.517 |

|    |             |         |
|----|-------------|---------|
| 21 | Particle 21 | 209.383 |
| 22 | Particle 22 | 309.063 |
| 23 | Particle 23 | 407.352 |
| 24 | Particle 24 | 185.432 |
| 25 | Particle 25 | 227.424 |
| 26 | Particle 26 | 294.065 |
| 27 | Particle 27 | 313.737 |
| 28 | Particle 28 | 347.375 |
| 29 | Particle 29 | 506.896 |
| 30 | Particle 30 | 363.849 |
| 31 | Particle 31 | 224.129 |
| 32 | Particle 32 | 214.291 |
| 33 | Particle 33 | 422.589 |
| 34 | Particle 34 | 408.508 |
| 35 | Particle 35 | 120.728 |
| 36 | Particle 36 | 141.858 |
| 37 | Particle 37 | 102.488 |
| 38 | Particle 38 | 94.409  |
| 39 | Particle 39 | 321.994 |
| 40 | Particle 40 | 91.454  |
| 41 | Particle 41 | 87.756  |
| 42 | Particle 42 | 187.963 |
| 43 | Particle 43 | 278.597 |
| 44 | Particle 44 | 102.549 |
| 45 | Particle 45 | 135.019 |
| 46 | Particle 46 | 81.024  |
| 47 | Particle 47 | 82.299  |
| 48 | Particle 48 | 92.005  |
| 49 | Particle 49 | 108.501 |
| 50 | Particle 50 | 224.773 |
| 51 | Particle 51 | 214.817 |

|    |             |         |
|----|-------------|---------|
| 52 | Particle 52 | 324.301 |
| 53 | Particle 53 | 114.989 |
| 54 | Particle 54 | 100.837 |
| 55 | Particle 55 | 236.777 |
| 56 | Particle 56 | 144.767 |
| 57 | Particle 57 | 152.767 |
| 58 | Particle 58 | 195.312 |
| 59 | Particle 59 | 395.284 |
| 60 | Particle 60 | 296.506 |
| 61 | Particle 61 | 254.019 |
| 62 | Particle 62 | 208.254 |
| 63 | Particle 63 | 289.123 |
| 64 | Particle 64 | 99.848  |
| 65 | Particle 65 | 93.205  |
| 66 | Particle 66 | 238.224 |
| 67 | Particle 67 | 184.126 |
| 68 | Particle 68 | 148.064 |
| 69 | Particle 69 | 68.993  |
| 70 | Particle 70 | 132.362 |
| 71 | Particle 71 | 169.155 |
| 72 | Particle 72 | 377.489 |
| 73 | Particle 73 | 205.859 |
| 74 | Particle 74 | 102.052 |
| 75 | Particle 75 | 630.662 |
| 76 | Particle 76 | 476.518 |
| 77 | Particle 77 | 105.302 |
| 78 | Particle 78 | 241.550 |
| 79 | Particle 79 | 84.735  |
| 80 | Particle 80 | 91.580  |
| 81 | Particle 81 | 110.275 |
| 82 | Particle 82 | 108.568 |

|     |             |         |
|-----|-------------|---------|
| 83  | Particle 83 | 103.660 |
| 84  | Particle 84 | 130.620 |
| 85  | Particle 85 | 127.295 |
| 86  | Particle 86 | 142.896 |
| 87  | Particle 87 | 241.106 |
| 88  | Particle 88 | 295.541 |
| 89  | Particle 89 | 254.245 |
| 90  | Particle 90 | 308.342 |
| 91  | Particle 91 | 332.531 |
| 92  | Particle 92 | 250.473 |
| 93  | Particle 93 | 341.119 |
| 94  | Particle 94 | 406.560 |
| 95  | Particle 95 | 245.190 |
| 96  | Particle 96 | 307.897 |
| 97  | Particle 97 | 246.850 |
| 98  | Particle 98 | 232.027 |
| 99  | Particle 99 | 314.227 |
|     | Particle    |         |
| 100 | 100         | 228.042 |
|     | Particle    |         |
| 101 | 101         | 120.767 |
|     | Particle    |         |
| 102 | 102         | 117.932 |
|     | Particle    |         |
| 103 | 103         | 128.377 |
|     | Particle    |         |
| 104 | 104         | 121.562 |
|     | Particle    |         |
| 105 | 105         | 87.087  |
|     | Particle    |         |
| 106 | 106         | 85.770  |
|     | Particle    |         |
| 107 | 107         | 104.238 |

|     |          |         |
|-----|----------|---------|
|     | Particle |         |
| 108 | 108      | 87.120  |
|     | Particle |         |
| 109 | 109      | 84.122  |
|     | Particle |         |
| 110 | 110      | 377.066 |
|     | Particle |         |
| 111 | 111      | 189.108 |
|     | Particle |         |
| 112 | 112      | 780.238 |
|     | Particle |         |
| 113 | 113      | 427.928 |
|     | Particle |         |
| 114 | 114      | 818.428 |
|     | Particle |         |
| 115 | 115      | 807.828 |
|     | Particle |         |
| 116 | 116      | 511.949 |
|     | Particle |         |
| 117 | 117      | 366.276 |
|     | Particle |         |
| 118 | 118      | 244.255 |
|     | Particle |         |
| 119 | 119      | 134.592 |
|     | Particle |         |
| 120 | 120      | 272.707 |
|     | Mean     | 276.819 |
|     | SD       | 198.225 |
|     | Min      | 68.993  |
|     | Max      | 980.235 |

Excel S2: RESULTS OBTAINED FROM THE STATISTICAL APPROACH DESCRIBED IN SECTION  
2.8

|                  | CTRL<br>NT | 6OHDA 0.04<br>mM | 0.05 mM Cit | 0.05 mM SLN-<br>Cit | 0.05 mM Plain-<br>SLNs | 0.06 mM<br>Cit | 0.06 mM SLN-<br>Cit |
|------------------|------------|------------------|-------------|---------------------|------------------------|----------------|---------------------|
| Exp 1 replicates | 0,750      | 0,618            | 0,640       | 0,721               | 0,622                  | 0,670          | 0,677               |
| Exp 1 replicates | 0,718      | 0,652            | 0,615       | 0,760               | 0,618                  | 0,622          | 0,701               |
| Exp 1 replicates | 0,701      | 0,719            | 0,691       | 0,724               | 0,711                  | 0,652          | 0,692               |
| Exp 2 replicates | 0,805      | 0,700            | 0,700       | 0,770               | 0,738                  | 0,618          | 0,749               |
| Exp 2 replicates | 0,848      | 0,626            | 0,701       | 0,806               | 0,699                  | 0,761          | 0,750               |
| Exp 2 replicates | 0,805      | 0,59             | 0,652       | 0,705               | 0,647                  | 0,7            | 0,732               |
| Exp 3 replicates | 0,482      | 0,406            | 0,425       | 0,523               | 0,415                  | 0,393          | 0,486               |
| Exp 3 replicates | 0,546      | 0,416            | 0,415       | 0,556               | 0,506                  | 0,453          | 0,508               |
| Exp 3 replicates | 0,531      | 0,36             | 0,387       | 0,5                 | 0,428                  | 0,367          | 0,474               |
| Exp 4 replicates | 0,584      | 0,554            | 0,578       | 0,575               | 0,582                  | 0,514          | 0,588               |
| Exp 4 replicates | 0,59       | 0,547            | 0,566       | 0,6                 | 0,57                   | 0,605          | 0,572               |
| Exp 4 replicates | 0,565      | 0,57             | 0,623       | 0,605               | 0,562                  | 0,573          | 0,538               |
| Exp 5 replicates | 0,378      | 0,31             | 0,298       | 0,319               | 0,319                  | 0,315          | 0,322               |
| Exp 5 replicates | 0,396      | 0,357            | 0,34        | 0,376               | 0,332                  | 0,33           | 0,376               |
| Exp 5 replicates | 0,379      | 0,325            | 0,326       | 0,353               | 0,334                  | 0,306          | 0,325               |

|             | CTRL NT | 6OHDA 0.04<br>mM | 0.05 mM Cit | 0.05 mM SLN-<br>Cit | 0.05 mM Plain-SLNs | 0.06 mM<br>Cit | 0.06 mM SLN-<br>Cit |
|-------------|---------|------------------|-------------|---------------------|--------------------|----------------|---------------------|
| Meane Exp 1 | 0,723   | 0,663            | 0,649       | 0,735               | 0,650              | 0,648          | 0,690               |
| Meane Exp 2 | 0,819   | 0,639            | 0,684       | 0,760               | 0,695              | 0,693          | 0,744               |
| Meane Exp 3 | 0,520   | 0,394            | 0,409       | 0,526               | 0,450              | 0,404          | 0,489               |
| Meane Exp 4 | 0,580   | 0,557            | 0,589       | 0,593               | 0,571              | 0,564          | 0,566               |
| Meane Exp 5 | 0,384   | 0,331            | 0,321       | 0,349               | 0,328              | 0,317          | 0,341               |

|                  | CTRL NT | 6OHDA 0.04<br>mM | 0.05 mM Cit | 0.05 mM SLN-<br>Cit | 0.05 mM Plain-SLNs | 0.06 mM<br>Cit | 0.06 mM SLN-<br>Cit |
|------------------|---------|------------------|-------------|---------------------|--------------------|----------------|---------------------|
| Number of values | 5       | 5                | 5           | 5                   | 5                  | 5              | 5                   |



|                |         |         |         |         |         |         |         |
|----------------|---------|---------|---------|---------|---------|---------|---------|
| Minimum        | 0,3843  | 0,3307  | 0,3213  | 0,3493  | 0,3283  | 0,317   | 0,341   |
| 25% Percentile | 0,452   | 0,3623  | 0,3652  | 0,4378  | 0,389   | 0,3607  | 0,4152  |
| Median         | 0,5797  | 0,557   | 0,589   | 0,5933  | 0,5713  | 0,564   | 0,566   |
| 75% Percentile | 0,7712  | 0,6508  | 0,6665  | 0,7477  | 0,6725  | 0,6705  | 0,7168  |
| Maximum        | 0,8193  | 0,663   | 0,6843  | 0,7603  | 0,6947  | 0,693   | 0,7437  |
| Mean           | 0,6052  | 0,5167  | 0,5305  | 0,5929  | 0,5389  | 0,5253  | 0,566   |
| Std. Deviation | 0,1706  | 0,148   | 0,1578  | 0,1673  | 0,15    | 0,1602  | 0,1608  |
| Std. Error     | 0,07632 | 0,06617 | 0,07056 | 0,07483 | 0,06709 | 0,07166 | 0,07192 |
| Lower 95% CI   | 0,3933  | 0,333   | 0,3346  | 0,3851  | 0,3526  | 0,3263  | 0,3663  |
| Upper 95% CI   | 0,8171  | 0,7004  | 0,7264  | 0,8006  | 0,7252  | 0,7242  | 0,7657  |

Table Analyzed

Data 6

Repeated Measures ANOVA

P value < 0,0001

P value summary \*\*\*

Are means signif. different? (P < 0.05) Yes

Number of groups 7

F 8,996

R square 0,6922

Was the pairing significantly effective?

R square 0,9297

F 258

P value < 0,0001

P value summary \*\*\*

Is there significant matching? (P < 0.05) Yes

| ANOVA Table                 | SS      | df | MS        |
|-----------------------------|---------|----|-----------|
| Treatment (between columns) | 0,03639 | 6  | 0,006064  |
| Individual (between rows)   | 0,6956  | 4  | 0,1739    |
| Residual (random)           | 0,01618 | 24 | 0,0006741 |
| Total                       | 0,7482  | 34 |           |

| Bonferroni's Multiple Comparison Test | Mean Diff, | t      | Significant? P < 0,05? | Summary | 95% CI of diff       |
|---------------------------------------|------------|--------|------------------------|---------|----------------------|
| CTRL NT vs 6OHDA 0.04 mM              | 0,08853    | 5,392  | Yes                    | ***     | 0,03277 to 0,1443    |
| CTRL NT vs 0.05 mM Cit                | 0,07473    | 4,551  | Yes                    | **      | 0,01897 to 0,1305    |
| CTRL NT vs 0.05 mM SLN-Cit            | 0,01233    | 0,7511 | No                     | ns      | -0,04343 to 0,06810  |
| CTRL NT vs 0.05 mM Plain-SLNs         | 0,06633    | 4,04   | Yes                    | *       | 0,01057 to 0,1221    |
| CTRL NT vs 0.06 mM Cit                | 0,07993    | 4,868  | Yes                    | **      | 0,02417 to 0,1357    |
| CTRL NT vs 0.06 mM SLN-Cit            | 0,0392     | 2,387  | No                     | ns      | -0,01656 to 0,09496  |
| 6OHDA 0.04 mM vs 0.05 mM Cit          | -0,0138    | 0,8404 | No                     | ns      | -0,06956 to 0,04196  |
| 6OHDA 0.04 mM vs 0.05 mM SLN-Cit      | -0,0762    | 4,641  | Yes                    | **      | -0,1320 to -0,02044  |
| 6OHDA 0.04 mM vs 0.05 mM Plain-SLNs   | -0,0222    | 1,352  | No                     | ns      | -0,07796 to 0,03356  |
| 6OHDA 0.04 mM vs 0.06 mM Cit          | -0,0086    | 0,5237 | No                     | ns      | -0,06436 to 0,04716  |
| 6OHDA 0.04 mM vs 0.06 mM SLN-Cit      | -0,04933   | 3,004  | No                     | ns      | -0,1051 to 0,006430  |
| 0.05 mM Cit vs 0.05 mM SLN-Cit        | -0,0624    | 3,8    | Yes                    | *       | -0,1182 to -0,006636 |
| 0.05 mM Cit vs 0.05 mM Plain-SLNs     | -0,0084    | 0,5116 | No                     | ns      | -0,06416 to 0,04736  |
| 0.05 mM Cit vs 0.06 mM Cit            | 0,0052     | 0,3167 | No                     | ns      | -0,05056 to 0,06096  |
| 0.05 mM Cit vs 0.06 mM SLN-Cit        | -0,03553   | 2,164  | No                     | ns      | -0,09130 to 0,02023  |
| 0.05 mM SLN-Cit vs 0.05 mM Plain-SLNs | 0,054      | 3,289  | No                     | ns      | -0,001764 to 0,1098  |
| 0.05 mM SLN-Cit vs 0.06 mM Cit        | 0,0676     | 4,117  | Yes                    | **      | 0,01184 to 0,1234    |
| 0.05 mM SLN-Cit vs 0.06 mM SLN-Cit    | 0,02687    | 1,636  | No                     | ns      | -0,02890 to 0,08263  |
| 0.05 mM Plain-SLNs vs 0.06 mM Cit     | 0,0136     | 0,8282 | No                     | ns      | -0,04216 to 0,06936  |
| 0.05 mM Plain-SLNs vs 0.06 mM SLN-Cit | -0,02713   | 1,652  | No                     | ns      | -0,08290 to 0,02863  |
| 0.06 mM Cit vs 0.06 mM SLN-Cit        | -0,04073   | 2,481  | No                     | ns      | -0,09650 to 0,01503  |



FURTHER TEM IMAGES THAT CONTAIN MANY SMALL PARTICLES AND DENOTE THE BROAD DISTRIBUTION OF THE SLNs

Figure S1. Additional TEM images of CIT-SLNs

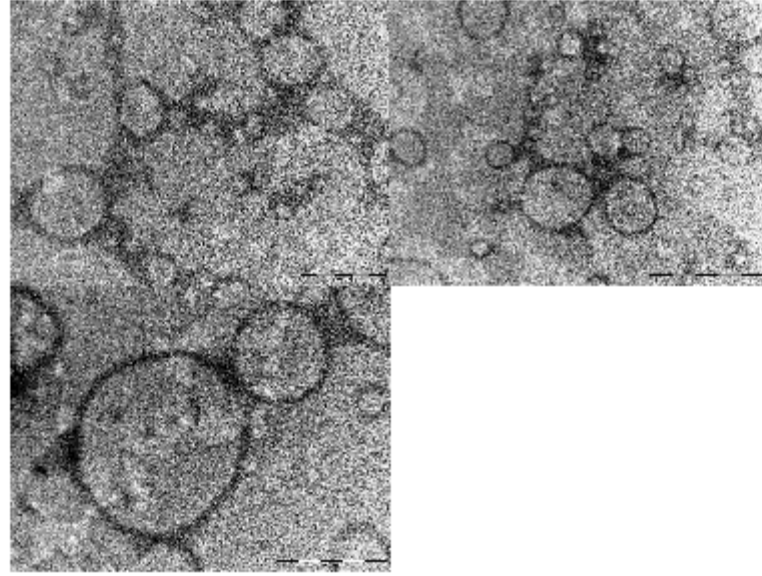

Supplement: s1 [file s1]
